# Supplementary material for: Cytoprotective and Cytotoxic Effects of Rice Bran Extracts in Rat H9c2(2-1) Cardiomyocytes
Source: PubMed Central journal article supplement (PMC4863109; doi:10.1155/2016/6943053), 2016-04-27
Supplement: 6943053.f1.pdf [file 6943053.f1.pdf]

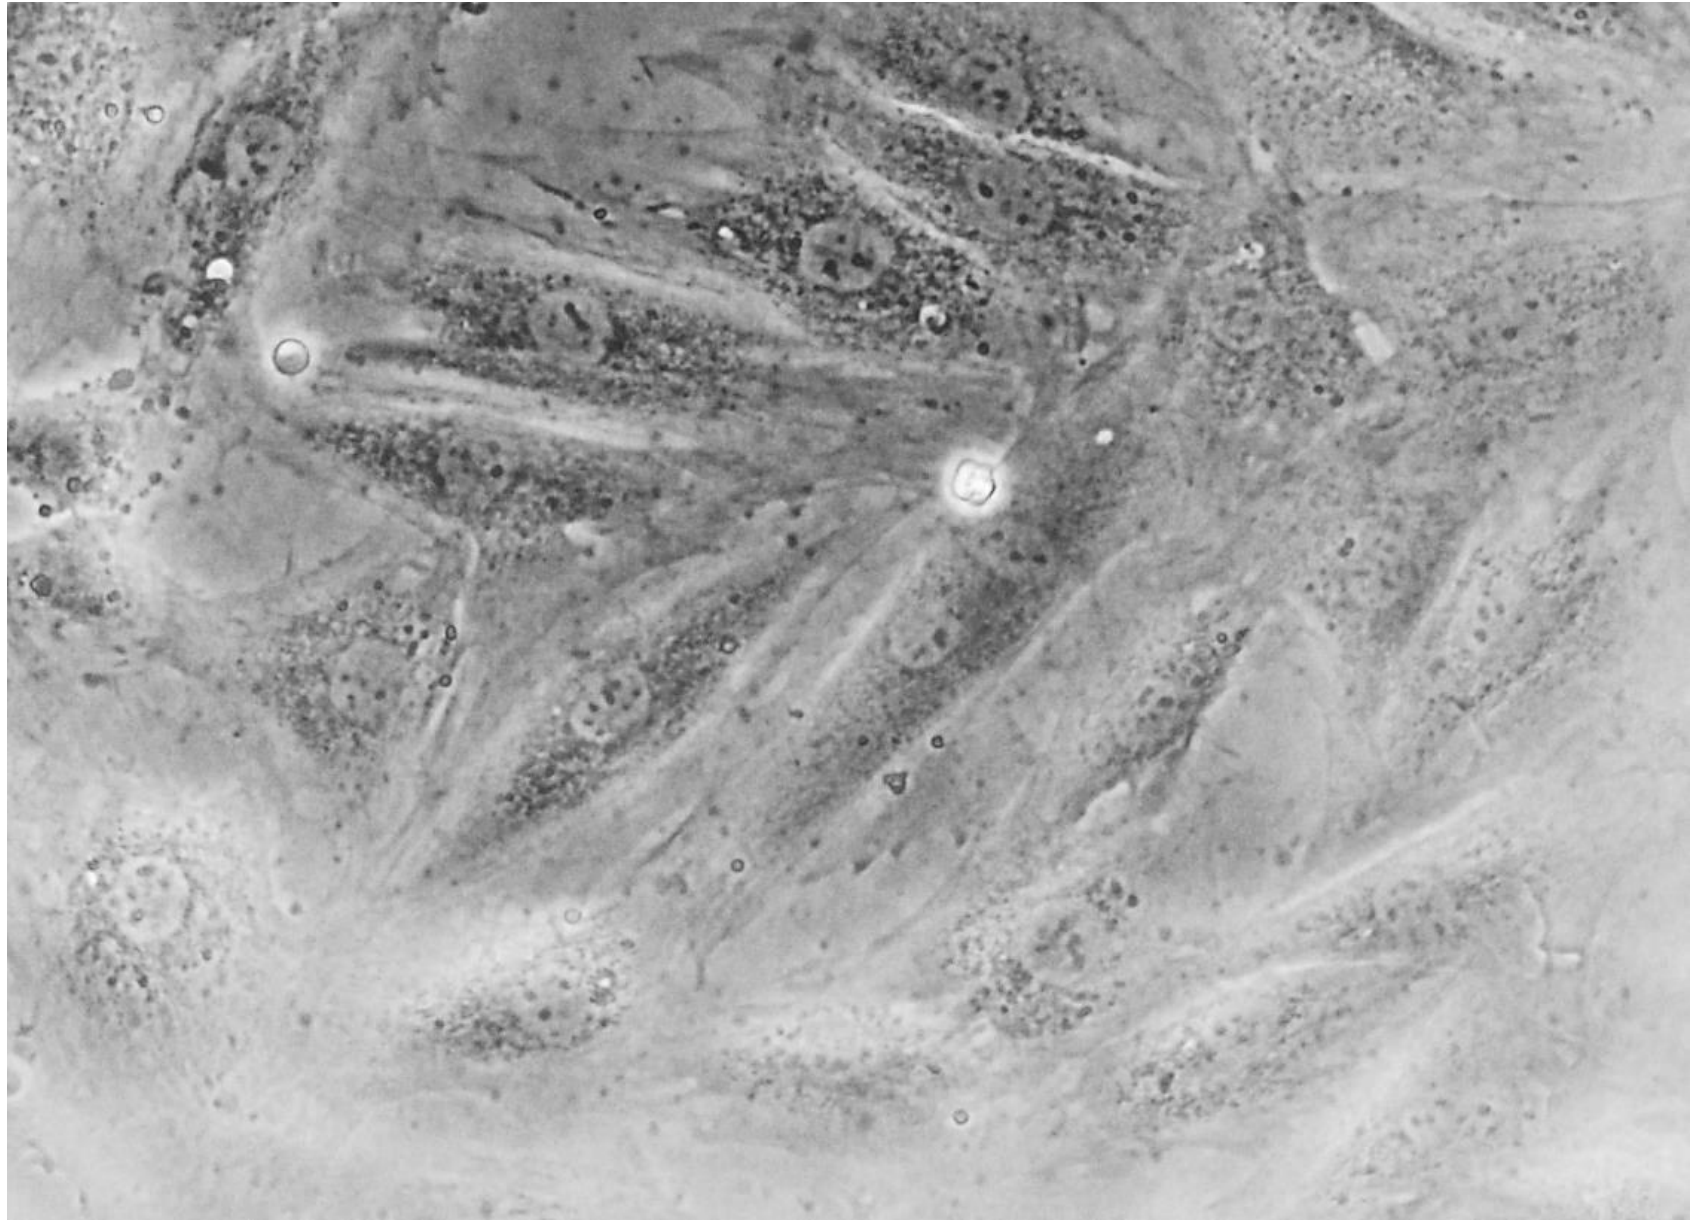

**Fig. A: Healthy rat H9c2(2-1) cardiomyocytes. Imaging with an inverted light microscope (Nikon Eclipse Ti-S: Mag 200x)**

**Table A: Cell viability of H9c2(2-1) after inductions with different concentrations of hydrogen peroxide (H<sub>2</sub>O<sub>2</sub>). Data presented were the mean  $\pm$  standard deviation of three replicates (n=3). ‘\*’ on each column denotes significant differences at  $P \leq 0.05$  as compared to negative control. Graphical representation of data is illustrated in Fig. 4.**

| <b>H<sub>2</sub>O<sub>2</sub> Induction on H9c2(2-1) Cardiomyocytes</b> |                                 |                                      |
|-------------------------------------------------------------------------|---------------------------------|--------------------------------------|
| <b>Log (Dose),<br/><math>\mu</math>M</b>                                | <b>Dose (<math>\mu</math>M)</b> | <b>Cell Viability (%)</b>            |
| <b>1.19</b>                                                             | <b>15.63</b>                    | <b>119.47 <math>\pm</math> 3.39*</b> |
| <b>1.49</b>                                                             | <b>31.25</b>                    | <b>115.27 <math>\pm</math> 5.48*</b> |
| <b>1.80</b>                                                             | <b>62.50</b>                    | <b>109.29 <math>\pm</math> 2.07*</b> |
| <b>2.10</b>                                                             | <b>125.00</b>                   | <b>101.29 <math>\pm</math> 3.57</b>  |
| <b>2.40</b>                                                             | <b>250.00</b>                   | <b>87.56 <math>\pm</math> 2.49*</b>  |
| <b>2.70</b>                                                             | <b>500.00</b>                   | <b>47.68 <math>\pm</math> 3.34*</b>  |
| <b>3.00</b>                                                             | <b>1000.00</b>                  | <b>3.43 <math>\pm</math> 1.00*</b>   |
